# Supplementary material for: Risk Factors and Prevalence of Helicobacter pylori in Five Largest Islands of Indonesia: A Preliminary Study
Source: PubMed Central journal article supplement (PMC4658100; doi:10.1371/journal.pone.0140186), 2015-11-23
Supplement: pone.0140186.s001.pdf [file pone.0140186.s001.pdf]

## Supporting Information Captions

**S1 Table. *H. pylori* infections were diagnosed based on the combined results of three methods from four different tests; culture, histology confirmed by immunohistochemistry and rapid urease test. When patients were considered to be *H. pylori* positive in case at least one test showed positive, the prevalence of *H. pylori* infection was 22.1% (59/267).**

| No | Name of sample |    | Age | Sex | Rapid urease test | Histology + IHC | Culture | 1 of 4 |
|----|----------------|----|-----|-----|-------------------|-----------------|---------|--------|
| 1  | JKT            | 1  | 57  | F   | 0                 | 0               | 0       | 0      |
| 2  | JKT            | 2  | 24  | M   | 0                 | 0               | 0       | 0      |
| 3  | JKT            | 3  | 35  | M   | 0                 | 0               | 0       | 0      |
| 4  | JKT            | 4  | 36  | M   | 0                 | 0               | 0       | 0      |
| 5  | JKT            | 5  | 23  | F   | 0                 | 0               | 0       | 0      |
| 6  | JKT            | 6  | 37  | F   | 0                 | 0               | 0       | 0      |
| 7  | JKT            | 7  | 41  | F   | 0                 | 0               | 0       | 0      |
| 8  | JKT            | 8  | 40  | F   | 0                 | 0               | 0       | 0      |
| 9  | JKT            | 9  | 48  | M   | 1                 | 1               | 1       | 1      |
| 10 | JKT            | 10 | 34  | M   | 0                 | 0               | 0       | 0      |
| 11 | JKT            | 11 | 64  | M   | 0                 | 0               | 0       | 0      |
| 12 | JKT            | 12 | 23  | M   | 0                 | 0               | 0       | 0      |
| 13 | JKT            | 13 | 38  | F   | 0                 | 0               | 0       | 0      |
| 14 | JKT            | 14 | 70  | M   | 0                 | 0               | 0       | 0      |
| 15 | JKT            | 15 | 60  | F   | 0                 | 0               | 0       | 0      |
| 16 | JKT            | 16 | 55  | M   | 0                 | 0               | 0       | 0      |
| 17 | JKT            | 20 | 65  | M   | 0                 | 0               | 0       | 0      |
| 18 | JKT            | 21 | 69  | F   | 0                 | 0               | 0       | 0      |
| 19 | JKT            | 22 | 29  | M   | 0                 | 0               | 0       | 0      |
| 20 | JKT            | 23 | 28  | M   | 0                 | 0               | 0       | 0      |
| 21 | JKT            | 24 | 43  | M   | 0                 | 0               | 0       | 0      |
| 22 | JKT            | 25 | 42  | F   | 0                 | 0               | 0       | 0      |
| 23 | JKT            | 26 | 65  | F   | 0                 | 0               | 0       | 0      |
| 24 | JKT            | 27 | 46  | F   | 0                 | 0               | 0       | 0      |
| 25 | JKT            | 28 | 61  | M   | 0                 | 0               | 0       | 0      |
| 26 | JKT            | 29 | 55  | M   | 0                 | 0               | 0       | 0      |
| 27 | JKT            | 30 | 65  | F   | 0                 | 0               | 0       | 0      |
| 28 | JKT            | 31 | 73  | F   | 0                 | 0               | 0       | 0      |
| 29 | JKT            | 32 | 54  | F   | 0                 | 0               | 0       | 0      |
| 30 | JKT            | 33 | 55  | F   | 0                 | 0               | 0       | 0      |
| 31 | JKT            | 34 | 62  | F   | 0                 | 0               | 0       | 0      |
| 32 | JAY            | 1  | 61  | M   | 1                 | 1               | 1       | 1      |
| 33 | JAY            | 2  | 63  | M   | 0                 | 0               | 0       | 0      |
| 34 | JAY            | 3  | 25  | M   | 1                 | 1               | 1       | 1      |

|    |     |    |    |   |   |   |   |   |
|----|-----|----|----|---|---|---|---|---|
| 35 | JAY | 4  | 26 | F | 1 | 1 | 1 | 1 |
| 36 | JAY | 5  | 41 | M | 0 | 0 | 0 | 0 |
| 37 | JAY | 6  | 41 | F | 1 | 1 | 1 | 1 |
| 38 | JAY | 7  | 37 | F | 0 | 0 | 0 | 0 |
| 39 | JAY | 8  | 31 | F | 1 | 1 | 1 | 1 |
| 40 | JAY | 9  | 41 | M | 0 | 0 | 0 | 0 |
| 41 | JAY | 10 | 28 | F | 0 | 0 | 0 | 0 |
| 42 | JAY | 11 | 32 | M | 0 | 0 | 0 | 0 |
| 43 | JAY | 12 | 34 | F | 1 | 1 | 1 | 1 |
| 44 | JAY | 13 | 46 | M | 0 | 0 | 0 | 0 |
| 45 | JAY | 14 | 47 | F | 0 | 0 | 0 | 0 |
| 46 | JAY | 15 | 59 | M | 1 | 1 | 1 | 1 |
| 47 | JAY | 16 | 52 | M | 0 | 1 | 1 | 1 |
| 48 | JAY | 17 | 42 | M | 0 | 0 | 0 | 0 |
| 49 | JAY | 18 | 23 | M | 0 | 0 | 0 | 0 |
| 50 | JAY | 19 | 33 | F | 0 | 0 | 0 | 0 |
| 51 | JAY | 20 | 32 | F | 0 | 0 | 0 | 0 |
| 52 | JAY | 21 | 48 | F | 1 | 1 | 1 | 1 |
| 53 | MDN | 1  | 63 | M | 0 | 0 | 0 | 0 |
| 54 | MDN | 2  | 63 | F | 0 | 0 | 0 | 0 |
| 55 | MDN | 3  | 69 | F | 0 | 0 | 0 | 0 |
| 56 | MDN | 4  | 47 | F | 0 | 0 | 0 | 0 |
| 57 | MDN | 5  | 52 | M | 0 | 0 | 0 | 0 |
| 58 | MDN | 6  | 29 | F | 0 | 0 | 0 | 0 |
| 59 | MDN | 7  | 47 | F | 0 | 0 | 0 | 0 |
| 60 | MDN | 8  | 47 | F | 1 | 0 | 0 | 1 |
| 61 | MDN | 9  | 74 | F | 0 | 0 | 0 | 0 |
| 62 | MDN | 10 | 35 | M | 0 | 0 | 0 | 0 |
| 63 | MDN | 11 | 76 | M | 0 | 0 | 0 | 0 |
| 64 | MDN | 12 | 39 | F | 0 | 0 | 0 | 0 |
| 65 | MDN | 13 | 57 | F | 0 | 0 | 0 | 0 |
| 66 | MDN | 14 | 45 | F | 0 | 0 | 0 | 0 |
| 67 | MDN | 15 | 80 | F | 0 | 0 | 0 | 0 |
| 68 | MDN | 16 | 62 | F | 0 | 0 | 0 | 0 |
| 69 | MDN | 17 | 52 | M | 1 | 1 | 1 | 1 |
| 70 | MDN | 18 | 60 | F | 0 | 0 | 0 | 0 |
| 71 | MDN | 19 | 50 | F | 0 | 0 | 0 | 0 |
| 72 | MDN | 20 | 64 | F | 0 | 0 | 0 | 0 |
| 73 | MDN | 21 | 54 | F | 0 | 0 | 0 | 0 |
| 74 | MDN | 22 | 68 | F | 0 | 0 | 0 | 0 |
| 75 | MDN | 23 | 52 | F | 1 | 1 | 1 | 1 |
| 76 | MDN | 24 | 40 | F | 0 | 0 | 0 | 0 |
| 77 | MDN | 25 | 57 | F | 0 | 0 | 0 | 0 |
| 78 | MDN | 26 | 50 | M | 0 | 0 | 0 | 0 |
| 79 | MDN | 27 | 27 | M | 1 | 1 | 1 | 1 |

|     |      |    |    |   |   |   |   |   |
|-----|------|----|----|---|---|---|---|---|
| 80  | MDN  | 28 | 33 | M | 0 | 0 | 0 | 0 |
| 81  | MDN2 | 1  | 30 | F | 0 | 0 | 0 | 0 |
| 82  | MDN2 | 2  | 61 | F | 0 | 0 | 0 | 0 |
| 83  | MDN2 | 3  | 59 | F | 1 | 1 | 1 | 1 |
| 84  | MDN2 | 4  | 33 | F | 0 | 0 | 0 | 0 |
| 85  | MDN2 | 5  | 44 | F | 0 | 0 | 0 | 0 |
| 86  | MDN2 | 6  | 55 | F | 0 | 0 | 0 | 0 |
| 87  | MDN2 | 8  | 51 | F | 0 | 0 | 0 | 0 |
| 88  | MDN2 | 9  | 69 | M | 0 | 0 | 0 | 0 |
| 89  | MDN2 | 10 | 28 | M | 1 | 1 | 1 | 1 |
| 90  | MDN2 | 11 | 43 | F | 1 | 1 | 1 | 1 |
| 91  | MDN2 | 12 | 39 | F | 0 | 0 | 0 | 0 |
| 92  | MDN2 | 13 | 28 | M | 0 | 0 | 0 | 0 |
| 93  | MDN2 | 15 | 61 | M | 1 | 1 | 1 | 1 |
| 94  | MDN2 | 16 | 41 | F | 1 | 1 | 0 | 1 |
| 95  | MDN2 | 17 | 42 | F | 0 | 0 | 0 | 0 |
| 96  | MDN2 | 18 | 56 | M | 0 | 0 | 0 | 0 |
| 97  | MDN2 | 19 | 38 | F | 1 | 1 | 1 | 1 |
| 98  | MDN2 | 20 | 45 | M | 1 | 1 | 1 | 1 |
| 99  | MDN2 | 21 | 53 | M | 0 | 0 | 0 | 0 |
| 100 | MDN2 | 22 | 27 | M | 1 | 1 | 1 | 1 |
| 101 | MDN2 | 23 | 46 | M | 1 | 1 | 1 | 1 |
| 102 | MDN2 | 24 | 45 | F | 1 | 1 | 1 | 1 |
| 103 | MDN2 | 25 | 58 | M | 1 | 1 | 1 | 1 |
| 104 | MDN2 | 26 | 41 | F | 1 | 1 | 0 | 1 |
| 105 | MDN2 | 27 | 47 | M | 0 | 0 | 0 | 0 |
| 106 | MDN2 | 28 | 24 | M | 0 | 0 | 1 | 1 |
| 107 | MDN2 | 29 | 56 | M | 1 | 1 | 0 | 1 |
| 108 | MDN2 | 30 | 60 | M | 1 | 0 | 1 | 1 |
| 109 | MKS  | 31 | 47 | M | 1 | 1 | 1 | 1 |
| 110 | MKS  | 32 | 59 | M | 0 | 0 | 0 | 0 |
| 111 | MKS  | 33 | 70 | M | 0 | 0 | 0 | 0 |
| 112 | MKS  | 34 | 31 | M | 0 | 0 | 0 | 0 |
| 113 | MKS  | 35 | 62 | F | 0 | 0 | 0 | 0 |
| 114 | MKS  | 36 | 68 | F | 0 | 0 | 0 | 0 |
| 115 | MKS  | 37 | 36 | F | 0 | 0 | 0 | 0 |
| 116 | MKS  | 38 | 34 | F | 1 | 0 | 0 | 1 |
| 117 | MKS  | 39 | 24 | M | 1 | 0 | 0 | 1 |
| 118 | MKS  | 40 | 74 | F | 1 | 0 | 0 | 1 |
| 119 | MKS  | 41 | 30 | M | 0 | 0 | 0 | 0 |
| 120 | MKS  | 42 | 36 | M | 0 | 0 | 0 | 0 |
| 121 | MKS  | 43 | 49 | M | 0 | 0 | 0 | 0 |
| 122 | MKS  | 44 | 43 | F | 0 | 0 | 0 | 0 |
| 123 | MKS  | 45 | 29 | M | 1 | 1 | 1 | 1 |
| 124 | MKS  | 46 | 46 | F | 0 | 0 | 0 | 0 |

|     |     |    |    |   |   |   |   |   |
|-----|-----|----|----|---|---|---|---|---|
| 125 | MKS | 47 | 46 | M | 1 | 1 | 1 | 1 |
| 126 | MKS | 48 | 41 | F | 0 | 0 | 0 | 0 |
| 127 | MKS | 49 | 22 | F | 0 | 0 | 0 | 0 |
| 128 | MKS | 50 | 72 | F | 0 | 0 | 0 | 0 |
| 129 | MKS | 51 | 56 | M | 0 | 1 | 0 | 1 |
| 130 | MKS | 52 | 58 | F | 0 | 0 | 1 | 1 |
| 131 | MKS | 53 | 33 | F | 0 | 0 | 0 | 0 |
| 132 | MKS | 54 | 65 | M | 0 | 0 | 0 | 0 |
| 133 | MKS | 55 | 76 | M | 1 | 1 | 1 | 1 |
| 134 | MKS | 56 | 67 | F | 1 | 1 | 1 | 1 |
| 135 | MKS | 57 | 67 | M | 1 | 0 | 0 | 1 |
| 136 | MKS | 58 | 67 | M | 0 | 0 | 0 | 0 |
| 137 | MKS | 59 | 41 | M | 0 | 0 | 0 | 0 |
| 138 | MKS | 60 | 50 | F | 0 | 0 | 0 | 0 |
| 139 | PTN | 61 | 22 | F | 0 | 0 | 0 | 0 |
| 140 | PTN | 62 | 27 | F | 0 | 0 | 0 | 0 |
| 141 | PTN | 63 | 50 | F | 1 | 1 | 1 | 1 |
| 142 | PTN | 64 | 64 | F | 0 | 0 | 0 | 0 |
| 143 | PTN | 65 | 54 | M | 0 | 0 | 0 | 0 |
| 144 | PTN | 66 | 42 | M | 0 | 0 | 0 | 0 |
| 145 | PTN | 67 | 64 | F | 0 | 0 | 0 | 0 |
| 146 | PTN | 68 | 41 | M | 0 | 0 | 0 | 0 |
| 147 | PTN | 69 | 39 | M | 0 | 0 | 0 | 0 |
| 148 | PTN | 70 | 32 | M | 0 | 0 | 0 | 0 |
| 149 | PTN | 71 | 42 | F | 0 | 0 | 0 | 0 |
| 150 | PTN | 72 | 29 | F | 0 | 0 | 0 | 0 |
| 151 | PTN | 73 | 26 | M | 0 | 0 | 0 | 0 |
| 152 | PTN | 74 | 44 | M | 0 | 0 | 0 | 0 |
| 153 | PTN | 75 | 49 | M | 1 | 1 | 1 | 1 |
| 154 | PTN | 76 | 49 | M | 0 | 0 | 0 | 0 |
| 155 | PTN | 77 | 60 | F | 0 | 0 | 0 | 0 |
| 156 | PTN | 78 | 59 | F | 0 | 0 | 0 | 0 |
| 157 | PTN | 79 | 29 | F | 0 | 0 | 0 | 0 |
| 158 | PTN | 80 | 48 | M | 0 | 0 | 0 | 0 |
| 159 | PTN | 81 | 41 | M | 0 | 0 | 0 | 0 |
| 160 | PTN | 82 | 29 | M | 0 | 0 | 0 | 0 |
| 161 | PTN | 83 | 77 | M | 0 | 0 | 0 | 0 |
| 162 | PTN | 84 | 32 | M | 0 | 0 | 0 | 0 |
| 163 | PTN | 85 | 52 | F | 0 | 0 | 0 | 0 |
| 164 | PTN | 86 | 25 | M | 0 | 0 | 0 | 0 |
| 165 | PTN | 87 | 18 | M | 0 | 0 | 0 | 0 |
| 166 | PTN | 88 | 61 | M | 0 | 0 | 0 | 0 |
| 167 | PTN | 89 | 70 | F | 0 | 0 | 0 | 0 |
| 168 | PTN | 90 | 51 | F | 0 | 0 | 0 | 0 |
| 169 | PTN | 91 | 54 | M | 0 | 0 | 0 | 0 |

|     |      |     |    |   |   |   |   |   |
|-----|------|-----|----|---|---|---|---|---|
| 170 | PTN  | 92  | 41 | M | 1 | 0 | 0 | 1 |
| 171 | PTN  | 93  | 59 | F | 0 | 0 | 0 | 0 |
| 172 | PTN  | 94  | 41 | M | 0 | 0 | 0 | 0 |
| 173 | PTN  | 95  | 20 | M | 0 | 0 | 0 | 0 |
| 174 | PTN  | 96  | 50 | F | 0 | 0 | 0 | 0 |
| 175 | PTN  | 97  | 50 | F | 0 | 0 | 0 | 0 |
| 176 | PTN  | 98  | 55 | M | 0 | 0 | 0 | 0 |
| 177 | PTN  | 99  | 23 | F | 0 | 0 | 0 | 0 |
| 178 | PTN  | 100 | 18 | M | 0 | 0 | 0 | 0 |
| 179 | PTN2 | 1   | 77 | M | 0 | 0 | 0 | 0 |
| 180 | PTN2 | 2   | 64 | F | 0 | 0 | 0 | 0 |
| 181 | PTN2 | 3   | 48 | M | 0 | 0 | 0 | 0 |
| 182 | PTN2 | 4   | 25 | F | 0 | 0 | 0 | 0 |
| 183 | PTN2 | 5   | 31 | M | 0 | 0 | 0 | 0 |
| 184 | PTN2 | 6   | 46 | M | 0 | 0 | 0 | 0 |
| 185 | PTN2 | 7   | 58 | F | 0 | 0 | 0 | 0 |
| 186 | PTN2 | 8   | 61 | F | 0 | 0 | 0 | 0 |
| 187 | PTN2 | 9   | 64 | F | 0 | 0 | 0 | 0 |
| 188 | PTN2 | 10  | 49 | F | 0 | 0 | 0 | 0 |
| 189 | PTN2 | 11  | 59 | F | 0 | 0 | 0 | 0 |
| 190 | PTN2 | 12  | 63 | M | 0 | 0 | 0 | 0 |
| 191 | PTN2 | 13  | 55 | M | 1 | 0 | 0 | 1 |
| 192 | PTN2 | 14  | 54 | F | 0 | 0 | 0 | 0 |
| 193 | PTN2 | 15  | 32 | M | 0 | 0 | 0 | 0 |
| 194 | PTN2 | 16  | 56 | F | 0 | 0 | 0 | 0 |
| 195 | PTN2 | 17  | 42 | M | 0 | 0 | 0 | 0 |
| 196 | PTN2 | 18  | 58 | F | 0 | 0 | 0 | 0 |
| 197 | PTN2 | 19  | 64 | M | 0 | 0 | 0 | 0 |
| 198 | PTN2 | 20  | 35 | F | 1 | 1 | 1 | 1 |
| 199 | PTN2 | 21  | 74 | M | 0 | 0 | 0 | 0 |
| 200 | PTN2 | 22  | 33 | M | 0 | 0 | 0 | 0 |
| 201 | PTN2 | 23  | 41 | M | 0 | 1 | 0 | 1 |
| 202 | PTN2 | 24  | 70 | M | 0 | 0 | 0 | 0 |
| 203 | MDN3 | 1   | 36 | F | 0 | 0 | 0 | 0 |
| 204 | MDN3 | 2   | 34 | M | 0 | 0 | 0 | 0 |
| 205 | MDN3 | 3   | 47 | M | 0 | 0 | 0 | 0 |
| 206 | MDN3 | 4   | 52 | M | 0 | 1 | 0 | 1 |
| 207 | MDN3 | 5   | 56 | F | 1 | 1 | 0 | 1 |
| 208 | MDN3 | 6   | 43 | M | 0 | 0 | 0 | 0 |
| 209 | MDN3 | 7   | 49 | M | 1 | 0 | 0 | 1 |
| 210 | MDN3 | 8   | 43 | F | 1 | 0 | 0 | 1 |
| 211 | MDN3 | 9   | 43 | F | 1 | 0 | 0 | 1 |
| 212 | MDN3 | 10  | 58 | M | 1 | 1 | 0 | 1 |
| 213 | MDN3 | 11  | 65 | F | 0 | 0 | 0 | 0 |
| 214 | MDN3 | 12  | 46 | F | 1 | 0 | 0 | 1 |

|     |      |     |    |   |   |   |   |   |
|-----|------|-----|----|---|---|---|---|---|
| 215 | MDN3 | 13  | 48 | F | 0 | 0 | 0 | 0 |
| 216 | MDN3 | 14  | 57 | F | 1 | 0 | 0 | 1 |
| 217 | MDN3 | 15  | 50 | F | 1 | 0 | 0 | 1 |
| 218 | SBY  | 105 | 41 | F | 0 | 0 | 0 | 0 |
| 219 | SBY  | 106 | 67 | F | 1 | 1 | 1 | 1 |
| 220 | SBY  | 107 | 51 | M | 1 | 0 | 0 | 1 |
| 221 | SBY  | 108 | 34 | F | 0 | 0 | 0 | 0 |
| 222 | SBY  | 109 | 64 | M | 0 | 0 | 0 | 0 |
| 223 | SBY  | 110 | 26 | M | 0 | 0 | 0 | 0 |
| 224 | SBY  | 111 | 44 | F | 0 | 0 | 0 | 0 |
| 225 | SBY  | 112 | 64 | M | 0 | 0 | 0 | 0 |
| 226 | SBY  | 113 | 27 | F | 0 | 0 | 0 | 0 |
| 227 | SBY  | 114 | 23 | F | 0 | 0 | 0 | 0 |
| 228 | SBY  | 115 | 52 | F | 0 | 0 | 0 | 0 |
| 229 | SBY  | 116 | 46 | M | 0 | 0 | 0 | 0 |
| 230 | SBY  | 117 | 49 | F | 0 | 0 | 0 | 0 |
| 231 | SBY  | 118 | 50 | F | 0 | 0 | 0 | 0 |
| 232 | SBY  | 119 | 46 | M | 0 | 0 | 0 | 0 |
| 233 | SBY  | 120 | 61 | F | 0 | 0 | 0 | 0 |
| 234 | SBY  | 121 | 53 | M | 0 | 0 | 0 | 0 |
| 235 | SBY  | 122 | 48 | F | 0 | 0 | 0 | 0 |
| 236 | SBY  | 123 | 60 | F | 0 | 0 | 0 | 0 |
| 237 | SBY  | 124 | 60 | F | 0 | 0 | 0 | 0 |
| 238 | SBY  | 125 | 37 | F | 0 | 0 | 0 | 0 |
| 239 | SBY  | 126 | 63 | F | 0 | 0 | 0 | 0 |
| 240 | SBY  | 127 | 22 | F | 0 | 0 | 0 | 0 |
| 241 | SBY  | 128 | 39 | F | 0 | 0 | 0 | 0 |
| 242 | SBY  | 129 | 23 | M | 0 | 0 | 0 | 0 |
| 243 | SBY  | 130 | 71 | F | 0 | 0 | 0 | 0 |
| 244 | SBY  | 131 | 57 | F | 0 | 0 | 0 | 0 |
| 245 | SBY  | 132 | 62 | M | 0 | 0 | 0 | 0 |
| 246 | SBY  | 133 | 54 | M | 0 | 0 | 0 | 0 |
| 247 | SBY  | 134 | 44 | F | 0 | 0 | 0 | 0 |
| 248 | SBY  | 135 | 55 | M | 0 | 0 | 0 | 0 |
| 249 | SBY  | 136 | 49 | M | 0 | 0 | 0 | 0 |
| 250 | SBY  | 137 | 61 | F | 1 | 0 | 1 | 1 |
| 251 | SBY  | 138 | 55 | F | 0 | 0 | 0 | 0 |
| 252 | SBY  | 139 | 22 | F | 0 | 0 | 0 | 0 |
| 253 | SBY  | 140 | 53 | F | 0 | 0 | 0 | 0 |
| 254 | SBY  | 141 | 25 | M | 0 | 0 | 0 | 0 |
| 255 | SBY  | 142 | 70 | F | 0 | 0 | 0 | 0 |
| 256 | SBY  | 143 | 47 | F | 0 | 0 | 0 | 0 |
| 257 | SBY  | 144 | 17 | F | 0 | 0 | 0 | 0 |
| 258 | SBY  | 145 | 39 | M | 0 | 0 | 0 | 0 |
| 259 | SBY  | 146 | 18 | F | 0 | 0 | 0 | 0 |

|     |     |     |    |   |   |   |   |   |
|-----|-----|-----|----|---|---|---|---|---|
| 260 | SBY | 147 | 49 | F | 0 | 0 | 0 | 0 |
| 261 | SBY | 148 | 49 | F | 0 | 0 | 0 | 0 |
| 262 | SBY | 149 | 56 | M | 0 | 0 | 0 | 0 |
| 263 | SBY | 150 | 39 | F | 0 | 0 | 0 | 0 |
| 264 | SBY | 151 | 77 | M | 1 | 1 | 1 | 1 |
| 265 | SBY | 152 | 69 | M | 0 | 0 | 0 | 0 |
| 266 | SBY | 153 | 32 | M | 0 | 0 | 0 | 0 |
| 267 | SBY | 154 | 39 | F | 0 | 0 | 0 | 0 |
